# Supplementary material for: Mutations in L-type amino acid transporter-2 support SLC7A8 as a novel gene involved in age-related hearing loss
Source: eLife. 2018 Jan 22;7:e31511. doi: 10.7554/eLife.31511 (PMC5811215; doi:10.7554/eLife.31511)
Supplement: Figure 5—source data 1. — Percentage of overexpressed mutated protein compared to the wild type (% Prot.). [file elife-31511-fig5-data1.xlsx]

## Sheet: Table S1
Figure 5-source data 1. Mutants expression and oligonucleotides for Site-Directed Mutagenesis (5’-3’). Percentage of overexpressed mutated protein compared to the wild type (% Prot.).
Mutation	% Prot.	Forward	Reverse
V302I	220.11	gctggcatccaacgccatcgctgtgacttttggag	ctccaaaagtcacagcgatggcgttggatgccagc
T402M	102.42	gctcttctatggggtcatggttgctggacagatag	ctatctgtccagcaaccatgaccccatagaagagc
R418C	100.53	gaagcctgatatcccctgtcccatcaagatcaacc	ggttgatcttgatgggacaggggatatcaggcttc
V460E	19.87	catcatgctgacaggagagcctgtctatttcctgg	ccaggaaatagacaggctctcctgtcagcatgatg
R8P	84.89	gaaggagccaggcacccaaacaacaccgaaaag	cttttcggtgttgtttgggtgcctggctccttc
A94T	93.04	ggagccctctgctatactgaactcggggtcacc	ggtgaccccgagttcagtatagcagagggctcc
R185L	96.6	gtgcggtgggccaccctggttcaagacatcttc	gaagatgtcttgaaccagggtggcccaccgcac
