# Supplementary material for: Mutations in L-type amino acid transporter-2 support SLC7A8 as a novel gene involved in age-related hearing loss
Source: eLife journal article supplement (doi:10.7554/elife.31511), 2018-01-22
Supplement: supp [file elife_poa_e31511_Transparent_Reporting_SourceData.xlsx]

## Sheet: Placa2645_3M WTs
SDS 2,2,2RQ Results	1
Filename	Placa2645,sdm
Assay Type	RQ Study
EmbeddedFile	Placa2645
Run DateTime	Wed Jun 07 11:46:39 GMT 2017
Operator
ThermalCycleParams
Well	PlateID	Sample	Detector	Task	Ct	delta Rn	delta Ct	Ct Avg	Ct SD	Avg Delta Ct	delta Ct SD	Endo Ct Avg	Endo Ct SD	delta delta Ct	RQ	RQ Min	RQ Max	Baseline Type	Baseline Start	Baseline Stop	Threshold Type	Threshold	Instrument	Well Status	Rejected	Filename
103		3M WT	Slc26a5	Target	30.935	3.15588		30.8678	0.0914082	7.8273	0.100185	23.0405	0.0410073	0	1	0.549952	1.81834	Automatic			Automatic	0.415006	279000594			Placa2645
104		3M WT	Slc26a5	Target	30.9814	3.13942		30.8678	0.0914082	7.8273	0.100185	23.0405	0.0410073	0	1	0.549952	1.81834	Automatic			Automatic	0.415006	279000594			Placa2645
105		3M WT	Slc26a5	Target	30.6869	3.28485		30.8678	0.0914082	7.8273	0.100185	23.0405	0.0410073	0	1	0.549952	1.81834	Automatic			Automatic	0.415006	279000594			Placa2645
109		3M WT	TBX18	Target	27.7837	3.23672		27.7927	0.0293693	4.75223	0.0504396	23.0405	0.0410073	0	1	0.740053	1.35126	Automatic			Automatic	0.470051	279000594			Placa2645
110		3M WT	TBX18	Target	27.747	3.32008		27.7927	0.0293693	4.75223	0.0504396	23.0405	0.0410073	0	1	0.740053	1.35126	Automatic			Automatic	0.470051	279000594			Placa2645
111		3M WT	TBX18	Target	27.8475	3.24884		27.7927	0.0293693	4.75223	0.0504396	23.0405	0.0410073	0	1	0.740053	1.35126	Automatic			Automatic	0.470051	279000594			Placa2645
115		3M WT	Kcnq2	Target	29.6853	3.37752		29.8516	0.085751	6.81111	0.0950517	23.0405	0.0410073	0	1	0.567061	1.76348	Automatic			Automatic	0.395476	279000594			Placa2645
116		3M WT	Kcnq2	Target	29.8986	3.19028		29.8516	0.085751	6.81111	0.0950517	23.0405	0.0410073	0	1	0.567061	1.76348	Automatic			Automatic	0.395476	279000594			Placa2645
117		3M WT	Kcnq2	Target	29.9709	3.11235		29.8516	0.085751	6.81111	0.0950517	23.0405	0.0410073	0	1	0.567061	1.76348	Automatic			Automatic	0.395476	279000594			Placa2645
118		3M WT	Kcnq3	Target	29.9306	3.7453		29.9339	0.0230326	6.89338	0.047033	23.0405	0.0410073	0	1	0.755253	1.32406	Automatic			Automatic	0.503223	279000594			Placa2645
119		3M WT	Kcnq3	Target	29.8957	3.75453		29.9339	0.0230326	6.89338	0.047033	23.0405	0.0410073	0	1	0.755253	1.32406	Automatic			Automatic	0.503223	279000594			Placa2645
120		3M WT	Kcnq3	Target	29.9753	3.66282		29.9339	0.0230326	6.89338	0.047033	23.0405	0.0410073	0	1	0.755253	1.32406	Automatic			Automatic	0.503223	279000594			Placa2645
127		3M KO	Slc26a5	Target	32.6536	2.72706		32.5909	0.0317449	9.41326	0.0368458	23.1776	0.0187049	1.58597	0.333102	0.267346	0.41503	Automatic			Automatic	0.415006	279000594			Placa2645
128		3M KO	Slc26a5	Target	32.5679	2.76981		32.5909	0.0317449	9.41326	0.0368458	23.1776	0.0187049	1.58597	0.333102	0.267346	0.41503	Automatic			Automatic	0.415006	279000594			Placa2645
129		3M KO	Slc26a5	Target	32.5511	2.80863		32.5909	0.0317449	9.41326	0.0368458	23.1776	0.0187049	1.58597	0.333102	0.267346	0.41503	Automatic			Automatic	0.415006	279000594			Placa2645
133		3M KO	TBX18	Target	28.9885	3.22993		29.0726	0.0424125	5.89495	0.046354	23.1776	0.0187049	1.14272	0.452904	0.343446	0.597247	Automatic			Automatic	0.470051	279000594			Placa2645
134		3M KO	TBX18	Target	29.1047	3.29353		29.0726	0.0424125	5.89495	0.046354	23.1776	0.0187049	1.14272	0.452904	0.343446	0.597247	Automatic			Automatic	0.470051	279000594			Placa2645
135		3M KO	TBX18	Target	29.1245	3.21881		29.0726	0.0424125	5.89495	0.046354	23.1776	0.0187049	1.14272	0.452904	0.343446	0.597247	Automatic			Automatic	0.470051	279000594			Placa2645
139		3M KO	Kcnq2	Target	31.79	2.73035		31.8169	0.0198062	8.63927	0.0272426	23.1776	0.0187049	1.82816	0.281624	0.239364	0.331346	Automatic			Automatic	0.395476	279000594			Placa2645
140		3M KO	Kcnq2	Target	31.8052	2.7712		31.8169	0.0198062	8.63927	0.0272426	23.1776	0.0187049	1.82816	0.281624	0.239364	0.331346	Automatic			Automatic	0.395476	279000594			Placa2645
141		3M KO	Kcnq2	Target	31.8555	2.73475		31.8169	0.0198062	8.63927	0.0272426	23.1776	0.0187049	1.82816	0.281624	0.239364	0.331346	Automatic			Automatic	0.395476	279000594			Placa2645
142		3M KO	Kcnq3	Target	31.2921	3.55355		31.3183	0.120258	8.14068	0.121704	23.1776	0.0187049	1.2473	0.421237	0.203739	0.87092	Automatic			Automatic	0.503223	279000594			Placa2645
143		3M KO	Kcnq3	Target	31.5385	3.45361		31.3183	0.120258	8.14068	0.121704	23.1776	0.0187049	1.2473	0.421237	0.203739	0.87092	Automatic			Automatic	0.503223	279000594			Placa2645
144		3M KO	Kcnq3	Target	31.1244	3.56288		31.3183	0.120258	8.14068	0.121704	23.1776	0.0187049	1.2473	0.421237	0.203739	0.87092	Automatic			Automatic	0.503223	279000594			Placa2645
151		7M WT	Slc26a5	Target	30.9639	3.10555		30.9266	0.0422812	8.14687	0.0440319	22.7797	0.0122927	0.319572	0.801307	0.616127	1.04214	Automatic			Automatic	0.415006	279000594			Placa2645
152		7M WT	Slc26a5	Target	30.9736	3.0972		30.9266	0.0422812	8.14687	0.0440319	22.7797	0.0122927	0.319572	0.801307	0.616127	1.04214	Automatic			Automatic	0.415006	279000594			Placa2645
153		7M WT	Slc26a5	Target	30.8422	3.15512		30.9266	0.0422812	8.14687	0.0440319	22.7797	0.0122927	0.319572	0.801307	0.616127	1.04214	Automatic			Automatic	0.415006	279000594			Placa2645
157		7M WT	TBX18	Target	28.0755	3.2425		28.0285	0.0486211	5.24882	0.050151	22.7797	0.0122927	0.496595	0.708777	0.525437	0.956091	Automatic			Automatic	0.470051	279000594			Placa2645
158		7M WT	TBX18	Target	28.0787	3.28459		28.0285	0.0486211	5.24882	0.050151	22.7797	0.0122927	0.496595	0.708777	0.525437	0.956091	Automatic			Automatic	0.470051	279000594			Placa2645
159		7M WT	TBX18	Target	27.9313	3.35491		28.0285	0.0486211	5.24882	0.050151	22.7797	0.0122927	0.496595	0.708777	0.525437	0.956091	Automatic			Automatic	0.470051	279000594			Placa2645
163		7M WT	Kcnq2	Target	30.0766	3.09836		29.8539	0.122046	7.07422	0.122664	22.7797	0.0122927	0.263109	0.83329	0.400735	1.73275	Automatic			Automatic	0.395476	279000594			Placa2645
164		7M WT	Kcnq2	Target	29.829	3.16046		29.8539	0.122046	7.07422	0.122664	22.7797	0.0122927	0.263109	0.83329	0.400735	1.73275	Automatic			Automatic	0.395476	279000594			Placa2645
165		7M WT	Kcnq2	Target	29.6561	3.22109		29.8539	0.122046	7.07422	0.122664	22.7797	0.0122927	0.263109	0.83329	0.400735	1.73275	Automatic			Automatic	0.395476	279000594			Placa2645
166		7M WT	Kcnq3	Target	29.6052	3.85444		29.5949	0.0104342	6.81525	0.016124	22.7797	0.0122927	-0.0781326	1.05565	0.958799	1.16229	Automatic			Automatic	0.503223	279000594			Placa2645
167		7M WT	Kcnq3	Target	29.6056	3.88115		29.5949	0.0104342	6.81525	0.016124	22.7797	0.0122927	-0.0781326	1.05565	0.958799	1.16229	Automatic			Automatic	0.503223	279000594			Placa2645
168		7M WT	Kcnq3	Target	29.5741	3.82527		29.5949	0.0104342	6.81525	0.016124	22.7797	0.0122927	-0.0781326	1.05565	0.958799	1.16229	Automatic			Automatic	0.503223	279000594			Placa2645
175		7M KO	Slc26a5	Target	32.9125	2.6439		32.9446	0.0417284	9.96648	0.0495185	22.9781	0.0266613	2.13919	0.227007	0.168924	0.305063	Automatic			Automatic	0.415006	279000594			Placa2645
176		7M KO	Slc26a5	Target	32.8939	2.73188		32.9446	0.0417284	9.96648	0.0495185	22.9781	0.0266613	2.13919	0.227007	0.168924	0.305063	Automatic			Automatic	0.415006	279000594			Placa2645
177		7M KO	Slc26a5	Target	33.0274	2.7064		32.9446	0.0417284	9.96648	0.0495185	22.9781	0.0266613	2.13919	0.227007	0.168924	0.305063	Automatic			Automatic	0.415006	279000594			Placa2645
181		7M KO	TBX18	Target	29.2563	3.20072		29.1572	0.0822672	6.17912	0.0864795	22.9781	0.0266613	1.42689	0.371932	0.221979	0.623182	Automatic			Automatic	0.470051	279000594			Placa2645
182		7M KO	TBX18	Target	28.9939	3.35356		29.1572	0.0822672	6.17912	0.0864795	22.9781	0.0266613	1.42689	0.371932	0.221979	0.623182	Automatic			Automatic	0.470051	279000594			Placa2645
183		7M KO	TBX18	Target	29.2215	3.32721		29.1572	0.0822672	6.17912	0.0864795	22.9781	0.0266613	1.42689	0.371932	0.221979	0.623182	Automatic			Automatic	0.470051	279000594			Placa2645
187		7M KO	Kcnq2	Target	31.3225	2.8707		31.3338	0.0380185	8.35566	0.0464352	22.9781	0.0266613	1.54454	0.342804	0.259829	0.452277	Automatic			Automatic	0.395476	279000594			Placa2645
188		7M KO	Kcnq2	Target	31.4045	2.93018		31.3338	0.0380185	8.35566	0.0464352	22.9781	0.0266613	1.54454	0.342804	0.259829	0.452277	Automatic			Automatic	0.395476	279000594			Placa2645
189		7M KO	Kcnq2	Target	31.2743	2.93954		31.3338	0.0380185	8.35566	0.0464352	22.9781	0.0266613	1.54454	0.342804	0.259829	0.452277	Automatic			Automatic	0.395476	279000594			Placa2645
190		7M KO	Kcnq3	Target	31.0727	3.67531		31.0347	0.0450691	8.05662	0.0523646	22.9781	0.0266613	1.16324	0.446509	0.326666	0.610319	Automatic			Automatic	0.503223	279000594			Placa2645
191		7M KO	Kcnq3	Target	31.0866	3.69104		31.0347	0.0450691	8.05662	0.0523646	22.9781	0.0266613	1.16324	0.446509	0.326666	0.610319	Automatic			Automatic	0.503223	279000594			Placa2645
192		7M KO	Kcnq3	Target	30.945	3.72516		31.0347	0.0450691	8.05662	0.0523646	22.9781	0.0266613	1.16324	0.446509	0.326666	0.610319	Automatic			Automatic	0.503223	279000594			Placa2645
199		3M WT	Kcnq5	Target	31.4488	3.23912		31.3744	0.0633677	8.33388	0.0754789	23.0405	0.0410073	0	1	0.637326	1.56906	Automatic			Automatic	0.526529	279000594			Placa2645
200		3M WT	Kcnq5	Target	31.426	3.31529		31.3744	0.0633677	8.33388	0.0754789	23.0405	0.0410073	0	1	0.637326	1.56906	Automatic			Automatic	0.526529	279000594			Placa2645
201		3M WT	Kcnq5	Target	31.2483	3.33788		31.3744	0.0633677	8.33388	0.0754789	23.0405	0.0410073	0	1	0.637326	1.56906	Automatic			Automatic	0.526529	279000594			Placa2645
205		3M WT	HPRT1	Endogenous Control	27.6341	4.21441						23.0405	0.0410073					Automatic			Automatic	0.488163	279000594			Placa2645
206		3M WT	HPRT1	Endogenous Control	27.6211	4.2261						23.0405	0.0410073					Automatic			Automatic	0.488163	279000594			Placa2645
207		3M WT	HPRT1	Endogenous Control	27.5663	4.25774						23.0405	0.0410073					Automatic			Automatic	0.488163	279000594			Placa2645
208		3M WT	RPLP0	Endogenous Control	23.1091	4.50909		23.0405	0.0410073			23.0405	0.0410073					Automatic			Automatic	0.551417	279000594			Placa2645
209		3M WT	RPLP0	Endogenous Control	22.9673	4.72855		23.0405	0.0410073			23.0405	0.0410073					Automatic			Automatic	0.551417	279000594			Placa2645
210		3M WT	RPLP0	Endogenous Control	23.0451	4.82399		23.0405	0.0410073			23.0405	0.0410073					Automatic			Automatic	0.551417	279000594			Placa2645
223		3M KO	Kcnq5	Target	31.2462	3.38058		31.3308	0.0424985	8.15319	0.0464327	23.1776	0.0187049	-0.180695	1.13343	0.859098	1.49536	Automatic			Automatic	0.526529	279000594			Placa2645
224		3M KO	Kcnq5	Target	31.3799	3.29681		31.3308	0.0424985	8.15319	0.0464327	23.1776	0.0187049	-0.180695	1.13343	0.859098	1.49536	Automatic			Automatic	0.526529	279000594			Placa2645
225		3M KO	Kcnq5	Target	31.3664	3.34949		31.3308	0.0424985	8.15319	0.0464327	23.1776	0.0187049	-0.180695	1.13343	0.859098	1.49536	Automatic			Automatic	0.526529	279000594			Placa2645
229		3M KO	HPRT1	Endogenous Control	28.11	4.10221						23.1776	0.0187049					Automatic			Automatic	0.488163	279000594			Placa2645
230		3M KO	HPRT1	Endogenous Control	28.1254	4.15822						23.1776	0.0187049					Automatic			Automatic	0.488163	279000594			Placa2645
231		3M KO	HPRT1	Endogenous Control	28.117	4.11398						23.1776	0.0187049					Automatic			Automatic	0.488163	279000594			Placa2645
232		3M KO	RPLP0	Endogenous Control	23.1545	4.6248		23.1776	0.0187049			23.1776	0.0187049					Automatic			Automatic	0.551417	279000594			Placa2645
233		3M KO	RPLP0	Endogenous Control	23.1638	4.65008		23.1776	0.0187049			23.1776	0.0187049					Automatic			Automatic	0.551417	279000594			Placa2645
234		3M KO	RPLP0	Endogenous Control	23.2147	4.68417		23.1776	0.0187049			23.1776	0.0187049					Automatic			Automatic	0.551417	279000594			Placa2645
247		7M WT	Kcnq5	Target	30.3773	3.48233		30.4588	0.0448183	7.6791	0.0464735	22.7797	0.0122927	-0.654783	1.57438	1.19303	2.07762	Automatic			Automatic	0.526529	279000594			Placa2645
248		7M WT	Kcnq5	Target	30.5319	3.49606		30.4588	0.0448183	7.6791	0.0464735	22.7797	0.0122927	-0.654783	1.57438	1.19303	2.07762	Automatic			Automatic	0.526529	279000594			Placa2645
249		7M WT	Kcnq5	Target	30.4672	3.5501		30.4588	0.0448183	7.6791	0.0464735	22.7797	0.0122927	-0.654783	1.57438	1.19303	2.07762	Automatic			Automatic	0.526529	279000594			Placa2645
253		7M WT	HPRT1	Endogenous Control	27.3131	4.31392						22.7797	0.0122927					Automatic			Automatic	0.488163	279000594			Placa2645
254		7M WT	HPRT1	Endogenous Control	27.3226	4.22846						22.7797	0.0122927					Automatic			Automatic	0.488163	279000594			Placa2645
255		7M WT	HPRT1	Endogenous Control	27.3551	4.29161						22.7797	0.0122927					Automatic			Automatic	0.488163	279000594			Placa2645
256		7M WT	RPLP0	Endogenous Control	22.7551	4.71983		22.7797	0.0122927			22.7797	0.0122927					Automatic			Automatic	0.551417	279000594			Placa2645
257		7M WT	RPLP0	Endogenous Control	22.7909	4.63762		22.7797	0.0122927			22.7797	0.0122927					Automatic			Automatic	0.551417	279000594			Placa2645
258		7M WT	RPLP0	Endogenous Control	22.7931	4.67813		22.7797	0.0122927			22.7797	0.0122927					Automatic			Automatic	0.551417	279000594			Placa2645
271		7M KO	Kcnq5	Target	31.9572	3.24833		31.8202	0.112383	8.84212	0.115502	22.9781	0.0266613	0.508242	0.703079	0.352881	1.40081	Automatic			Automatic	0.526529	279000594			Placa2645
272		7M KO	Kcnq5	Target	31.9061	3.34255		31.8202	0.112383	8.84212	0.115502	22.9781	0.0266613	0.508242	0.703079	0.352881	1.40081	Automatic			Automatic	0.526529	279000594			Placa2645
273		7M KO	Kcnq5	Target	31.5974	3.43328		31.8202	0.112383	8.84212	0.115502	22.9781	0.0266613	0.508242	0.703079	0.352881	1.40081	Automatic			Automatic	0.526529	279000594			Placa2645
277		7M KO	HPRT1	Endogenous Control	27.9629	4.13861						22.9781	0.0266613					Automatic			Automatic	0.488163	279000594			Placa2645
278		7M KO	HPRT1	Endogenous Control	27.9655	4.1586						22.9781	0.0266613					Automatic			Automatic	0.488163	279000594			Placa2645
279		7M KO	HPRT1	Endogenous Control	27.8823	4.22129						22.9781	0.0266613					Automatic			Automatic	0.488163	279000594			Placa2645
280		7M KO	RPLP0	Endogenous Control	22.9596	4.69074		22.9781	0.0266613			22.9781	0.0266613					Automatic			Automatic	0.551417	279000594			Placa2645
281		7M KO	RPLP0	Endogenous Control	23.0307	4.55846		22.9781	0.0266613			22.9781	0.0266613					Automatic			Automatic	0.551417	279000594			Placa2645
282		7M KO	RPLP0	Endogenous Control	22.9441	4.74974		22.9781	0.0266613			22.9781	0.0266613					Automatic			Automatic	0.551417	279000594			Placa2645
Summary Data for Study Placa2645,sdm
Endogenous Control	RPLP0
Calibrator	3M WT
Multiplicity	Non-Multiplex
PlateID	Sample	Detector	Avg delta Ct	delta Ct SD	delta delta Ct	RQ	RQ Min	RQ Max	Threshold	Sample Status
	3M WT	RPLP0							0.551417
	3M KO	RPLP0							0.551417
	7M WT	RPLP0							0.551417
	7M KO	RPLP0							0.551417
	3M WT	Kcnq2	6.81111	0.0950517	0	1	0.567061	1.76348	0.395476
	3M KO	Kcnq2	8.63927	0.0272426	1.82816	0.281624	0.239364	0.331346	0.395476
	7M WT	Kcnq2	7.07422	0.122664	0.263109	0.83329	0.400735	1.73275	0.395476
	7M KO	Kcnq2	8.35566	0.0464352	1.54454	0.342804	0.259829	0.452277	0.395476
	3M WT	Kcnq3	6.89338	0.047033	0	1	0.755253	1.32406	0.503223
	3M KO	Kcnq3	8.14068	0.121704	1.2473	0.421237	0.203739	0.87092	0.503223
	7M WT	Kcnq3	6.81525	0.016124	-0.0781326	1.05565	0.958799	1.16229	0.503223
	7M KO	Kcnq3	8.05662	0.0523646	1.16324	0.446509	0.326666	0.610319	0.503223
	3M WT	Kcnq5	8.33388	0.0754789	0	1	0.637326	1.56906	0.526529
	3M KO	Kcnq5	8.15319	0.0464327	-0.180695	1.13343	0.859098	1.49536	0.526529
	7M WT	Kcnq5	7.6791	0.0464735	-0.654783	1.57438	1.19303	2.07762	0.526529
	7M KO	Kcnq5	8.84212	0.115502	0.508242	0.703079	0.352881	1.40081	0.526529
	3M WT	Slc26a5	7.8273	0.100185	0	1	0.549952	1.81834	0.415006
	3M KO	Slc26a5	9.41326	0.0368458	1.58597	0.333102	0.267346	0.41503	0.415006
	7M WT	Slc26a5	8.14687	0.0440319	0.319572	0.801307	0.616127	1.04214	0.415006
	7M KO	Slc26a5	9.96648	0.0495185	2.13919	0.227007	0.168924	0.305063	0.415006
	3M WT	TBX18	4.75223	0.0504396	0	1	0.740053	1.35126	0.470051
	3M KO	TBX18	5.89495	0.046354	1.14272	0.452904	0.343446	0.597247	0.470051
	7M WT	TBX18	5.24882	0.050151	0.496595	0.708777	0.525437	0.956091	0.470051
	7M KO	TBX18	6.17912	0.0864795	1.42689	0.371932	0.221979	0.623182	0.470051

## Sheet: Placa2245
SDS 2,2,2RQ Results	1
Filename	Placa2245,sdm
Assay Type	RQ Study
EmbeddedFile	Placa2245
Run DateTime	Fri Apr 29 10:51:27 GMT 2016
Operator
ThermalCycleParams
Well	PlateID	Sample	Detector	Task	Ct	delta Rn	delta Ct	Ct Avg	Ct SD	Avg Delta Ct	delta Ct SD	Endo Ct Avg	Endo Ct SD	delta delta Ct	RQ	RQ Min	RQ Max	Baseline Type	Baseline Start	Baseline Stop	Threshold Type	Threshold	Instrument	Well Status	Rejected	Filename
16		3M WT	IL1B	Target	27.5897	3.28237		27.6625	0.0378694	3.73174	0.0450005	23.9307	0.0243096	1.70489	0.306746	0.234498	0.401253	Automatic			Automatic	0.402462	279000594			Placa2245
17		3M WT	IL1B	Target	27.6806	3.18351		27.6625	0.0378694	3.73174	0.0450005	23.9307	0.0243096	1.70489	0.306746	0.234498	0.401253	Automatic			Automatic	0.402462	279000594			Placa2245
18		3M WT	IL1B	Target	27.7171	3.1454		27.6625	0.0378694	3.73174	0.0450005	23.9307	0.0243096	1.70489	0.306746	0.234498	0.401253	Automatic			Automatic	0.402462	279000594			Placa2245
19		3M WT	IL6	Target	32.507	3.41337		32.5483	0.0367653	8.61751	0.0440755	23.9307	0.0243096	1.10815	0.463887	0.356591	0.603468	Automatic			Automatic	0.570586	279000594			Placa2245
20		3M WT	IL6	Target	32.5162	3.26821		32.5483	0.0367653	8.61751	0.0440755	23.9307	0.0243096	1.10815	0.463887	0.356591	0.603468	Automatic			Automatic	0.570586	279000594			Placa2245
21		3M WT	IL6	Target	32.6216	3.20985		32.5483	0.0367653	8.61751	0.0440755	23.9307	0.0243096	1.10815	0.463887	0.356591	0.603468	Automatic			Automatic	0.570586	279000594			Placa2245
22		3M WT	RPLP0	Endogenous Control	19.2085	4.14229						23.9307	0.0243096					Automatic			Automatic	0.504684	279000594			Placa2245
23		3M WT	RPLP0	Endogenous Control	19.1483	4.20732						23.9307	0.0243096					Automatic			Automatic	0.504684	279000594			Placa2245
24		3M WT	RPLP0	Endogenous Control	19.1159	4.33405						23.9307	0.0243096					Automatic			Automatic	0.504684	279000594			Placa2245
40		3M KO	IL1B	Target	26.3125	3.56156		26.4605	0.0741109	2.02685	0.0825466	24.4337	0.0363527	0	1	0.611002	1.63666	Automatic			Automatic	0.402462	279000594			Placa2245
41		3M KO	IL1B	Target	26.5413	3.37752		26.4605	0.0741109	2.02685	0.0825466	24.4337	0.0363527	0	1	0.611002	1.63666	Automatic			Automatic	0.402462	279000594			Placa2245
42		3M KO	IL1B	Target	26.5277	3.38832		26.4605	0.0741109	2.02685	0.0825466	24.4337	0.0363527	0	1	0.611002	1.63666	Automatic			Automatic	0.402462	279000594			Placa2245
43		3M KO	IL6	Target	31.7488	3.58937		31.943	0.117927	7.50936	0.123403	24.4337	0.0363527	0	1	0.478788	2.08861	Automatic			Automatic	0.570586	279000594			Placa2245
44		3M KO	IL6	Target	31.9242	3.47966		31.943	0.117927	7.50936	0.123403	24.4337	0.0363527	0	1	0.478788	2.08861	Automatic			Automatic	0.570586	279000594			Placa2245
45		3M KO	IL6	Target	32.156	3.43255		31.943	0.117927	7.50936	0.123403	24.4337	0.0363527	0	1	0.478788	2.08861	Automatic			Automatic	0.570586	279000594			Placa2245
46		3M KO	RPLP0	Endogenous Control	19.1353	4.3745						24.4337	0.0363527					Automatic			Automatic	0.504684	279000594			Placa2245
47		3M KO	RPLP0	Endogenous Control	19.2261	4.31038						24.4337	0.0363527					Automatic			Automatic	0.504684	279000594			Placa2245
48		3M KO	RPLP0	Endogenous Control	19.2444	4.44056						24.4337	0.0363527					Automatic			Automatic	0.504684	279000594			Placa2245
64		7M WT	IL1B	Target	27.0906	3.40967		27.1301	0.0282047	3.43929	0.0456815	23.6908	0.0359347	1.41244	0.375675	0.286027	0.49342	Automatic			Automatic	0.402462	279000594			Placa2245
65		7M WT	IL1B	Target	27.1848	3.30619		27.1301	0.0282047	3.43929	0.0456815	23.6908	0.0359347	1.41244	0.375675	0.286027	0.49342	Automatic			Automatic	0.402462	279000594			Placa2245
66		7M WT	IL1B	Target	27.115	3.36003		27.1301	0.0282047	3.43929	0.0456815	23.6908	0.0359347	1.41244	0.375675	0.286027	0.49342	Automatic			Automatic	0.402462	279000594			Placa2245
67		7M WT	IL6	Target	31.9297	3.45888		32.133	0.130109	8.4422	0.13498	23.6908	0.0359347	0.932846	0.523824	0.234058	1.17233	Automatic			Automatic	0.570586	279000594			Placa2245
68		7M WT	IL6	Target	32.0941	3.38286		32.133	0.130109	8.4422	0.13498	23.6908	0.0359347	0.932846	0.523824	0.234058	1.17233	Automatic			Automatic	0.570586	279000594			Placa2245
69		7M WT	IL6	Target	32.3753	3.2972		32.133	0.130109	8.4422	0.13498	23.6908	0.0359347	0.932846	0.523824	0.234058	1.17233	Automatic			Automatic	0.570586	279000594			Placa2245
70		7M WT	RPLP0	Endogenous Control	18.9692	4.15209						23.6908	0.0359347					Automatic			Automatic	0.504684	279000594			Placa2245
71		7M WT	RPLP0	Endogenous Control	18.946	4.27678						23.6908	0.0359347					Automatic			Automatic	0.504684	279000594			Placa2245
72		7M WT	RPLP0	Endogenous Control	18.8934	4.27235						23.6908	0.0359347					Automatic			Automatic	0.504684	279000594			Placa2245
88		7M KO	IL1B	Target	24.9637	3.5175		24.9274	0.0354968	0.544003	0.069225	24.3834	0.0594313	-1.48285	2.795	1.84907	4.22484	Automatic			Automatic	0.402462	279000594			Placa2245
89		7M KO	IL1B	Target	24.8564	3.56734		24.9274	0.0354968	0.544003	0.069225	24.3834	0.0594313	-1.48285	2.795	1.84907	4.22484	Automatic			Automatic	0.402462	279000594			Placa2245
90		7M KO	IL1B	Target	24.9621	3.48621		24.9274	0.0354968	0.544003	0.069225	24.3834	0.0594313	-1.48285	2.795	1.84907	4.22484	Automatic			Automatic	0.402462	279000594			Placa2245
91		7M KO	IL6	Target	31.4748	3.59496		31.4402	0.0297713	7.05679	0.0664711	24.3834	0.0594313	-0.452568	1.36847	0.920336	2.03482	Automatic			Automatic	0.570586	279000594			Placa2245
92		7M KO	IL6	Target	31.3809	3.56442		31.4402	0.0297713	7.05679	0.0664711	24.3834	0.0594313	-0.452568	1.36847	0.920336	2.03482	Automatic			Automatic	0.570586	279000594			Placa2245
93		7M KO	IL6	Target	31.4649	3.5365		31.4402	0.0297713	7.05679	0.0664711	24.3834	0.0594313	-0.452568	1.36847	0.920336	2.03482	Automatic			Automatic	0.570586	279000594			Placa2245
94		7M KO	RPLP0	Endogenous Control	19.639	4.23007						24.3834	0.0594313					Automatic			Automatic	0.504684	279000594			Placa2245
95		7M KO	RPLP0	Endogenous Control	19.0851	4.36744						24.3834	0.0594313					Automatic			Automatic	0.504684	279000594			Placa2245
96		7M KO	RPLP0	Endogenous Control	19.2659	4.28163						24.3834	0.0594313					Automatic			Automatic	0.504684	279000594			Placa2245
121		3M WT	HPRT1	Endogenous Control	23.8859	4.0657		23.9307	0.0243096			23.9307	0.0243096					Automatic			Automatic	0.483465	279000594			Placa2245
122		3M WT	HPRT1	Endogenous Control	23.9694	4.06722		23.9307	0.0243096			23.9307	0.0243096					Automatic			Automatic	0.483465	279000594			Placa2245
123		3M WT	HPRT1	Endogenous Control	23.9369	4.11663		23.9307	0.0243096			23.9307	0.0243096					Automatic			Automatic	0.483465	279000594			Placa2245
145		3M KO	HPRT1	Endogenous Control	24.3622	4.19791		24.4337	0.0363527			24.4337	0.0363527					Automatic			Automatic	0.483465	279000594			Placa2245
146		3M KO	HPRT1	Endogenous Control	24.4812	4.15492		24.4337	0.0363527			24.4337	0.0363527					Automatic			Automatic	0.483465	279000594			Placa2245
147		3M KO	HPRT1	Endogenous Control	24.4576	4.20843		24.4337	0.0363527			24.4337	0.0363527					Automatic			Automatic	0.483465	279000594			Placa2245
169		7M WT	HPRT1	Endogenous Control	23.729	4.05444		23.6908	0.0359347			23.6908	0.0359347					Automatic			Automatic	0.483465	279000594			Placa2245
170		7M WT	HPRT1	Endogenous Control	23.7245	4.03966		23.6908	0.0359347			23.6908	0.0359347					Automatic			Automatic	0.483465	279000594			Placa2245
171		7M WT	HPRT1	Endogenous Control	23.619	4.13183		23.6908	0.0359347			23.6908	0.0359347					Automatic			Automatic	0.483465	279000594			Placa2245
193		7M KO	HPRT1	Endogenous Control	24.4855	4.0052		24.3834	0.0594313			24.3834	0.0594313					Automatic			Automatic	0.483465	279000594			Placa2245
194		7M KO	HPRT1	Endogenous Control	24.2796	4.118		24.3834	0.0594313			24.3834	0.0594313					Automatic			Automatic	0.483465	279000594			Placa2245
195		7M KO	HPRT1	Endogenous Control	24.3851	4.00385		24.3834	0.0594313			24.3834	0.0594313					Automatic			Automatic	0.483465	279000594			Placa2245
Summary Data for Study Placa2245,sdm
Endogenous Control	HPRT1
Calibrator	3M KO
Multiplicity	Non-Multiplex
PlateID	Sample	Detector	Avg delta Ct	delta Ct SD	delta delta Ct	RQ	RQ Min	RQ Max	Threshold	Sample Status
	3M WT	HPRT1							0.483465
	3M KO	HPRT1							0.483465
	7M WT	HPRT1							0.483465
	7M KO	HPRT1							0.483465
	3M WT	IL1B	3.73174	0.0450005	1.70489	0.306746	0.234498	0.401253	0.402462
	3M KO	IL1B	2.02685	0.0825466	0	1	0.611002	1.63666	0.402462
	7M WT	IL1B	3.43929	0.0456815	1.41244	0.375675	0.286027	0.49342	0.402462
	7M KO	IL1B	0.544003	0.069225	-1.48285	2.795	1.84907	4.22484	0.402462
	3M WT	IL6	8.61751	0.0440755	1.10815	0.463887	0.356591	0.603468	0.570586
	3M KO	IL6	7.50936	0.123403	0	1	0.478788	2.08861	0.570586
	7M WT	IL6	8.4422	0.13498	0.932846	0.523824	0.234058	1.17233	0.570586
	7M KO	IL6	7.05679	0.0664711	-0.452568	1.36847	0.920336	2.03482	0.570586

## Sheet: Placa2306
SDS 2.2.2RQ Results	1.0
Filename	Placa2304-2305-2306-2307-2308.sdm
Assay Type	RQ Study
EmbeddedFile	Placa2305
Run DateTime	Tue Jun 21 10:10:15 GMT 2016
Operator
ThermalCycleParams
EmbeddedFile	Placa2306
Run DateTime	Tue Jun 21 13:43:19 GMT 2016
Operator
ThermalCycleParams
EmbeddedFile	Placa2307
Run DateTime	Wed Jun 22 10:11:47 GMT 2016
Operator
ThermalCycleParams
EmbeddedFile	Placa2308
Run DateTime	Wed Jun 22 12:00:05 GMT 2016
Operator
ThermalCycleParams
EmbeddedFile	Placa2304
Run DateTime	Mon Jun 20 14:00:31 GMT 2016
Operator
ThermalCycleParams
Well	PlateID	Sample	Detector	Task	Ct	delta Rn	delta Ct	Ct Avg	Ct SD	Avg Delta Ct	delta Ct SD	Endo Ct Avg	Endo Ct SD	delta delta Ct	RQ	RQ Min	RQ Max	Baseline Type	Baseline Start	Baseline Stop	Threshold Type	Threshold	Instrument	Well Status	Rejected	Filename
19		WT01	HPRT1	Endogenous Control	27.6589	5.24532		27.7228	0.0800457			27.7228	0.0800457					Automatic			Automatic	0.425135	279000594			Placa2306
20		WT01	HPRT1	Endogenous Control	27.8819	4.87925		27.7228	0.0800457			27.7228	0.0800457					Automatic			Automatic	0.425135	279000594			Placa2306
21		WT01	HPRT1	Endogenous Control	27.6276	5.02268		27.7228	0.0800457			27.7228	0.0800457					Automatic			Automatic	0.425135	279000594			Placa2306
43		WT02	HPRT1	Endogenous Control	27.5236	5.32027		27.5946	0.0496711			27.5946	0.0496711					Automatic			Automatic	0.425135	279000594			Placa2306
44		WT02	HPRT1	Endogenous Control	27.6903	5.05107		27.5946	0.0496711			27.5946	0.0496711					Automatic			Automatic	0.425135	279000594			Placa2306
45		WT02	HPRT1	Endogenous Control	27.5699	5.01511		27.5946	0.0496711			27.5946	0.0496711					Automatic			Automatic	0.425135	279000594			Placa2306
67		WT03	HPRT1	Endogenous Control	26.6255	5.28065		26.7033	0.042586			26.7033	0.042586					Automatic			Automatic	0.425135	279000594			Placa2306
68		WT03	HPRT1	Endogenous Control	26.7121	5.19228		26.7033	0.042586			26.7033	0.042586					Automatic			Automatic	0.425135	279000594			Placa2306
69		WT03	HPRT1	Endogenous Control	26.7722	5.04791		26.7033	0.042586			26.7033	0.042586					Automatic			Automatic	0.425135	279000594			Placa2306
91		WT04	HPRT1	Endogenous Control	27.0526	4.40597		27.1841	0.0726625			27.1841	0.0726625					Automatic			Automatic	0.425135	279000594			Placa2306
92		WT04	HPRT1	Endogenous Control	27.1961	4.87873		27.1841	0.0726625			27.1841	0.0726625					Automatic			Automatic	0.425135	279000594			Placa2306
93		WT04	HPRT1	Endogenous Control	27.3035	4.72444		27.1841	0.0726625			27.1841	0.0726625					Automatic			Automatic	0.425135	279000594			Placa2306
115		WT05	HPRT1	Endogenous Control	26.7966	5.44741		26.8171	0.0103786			26.8171	0.0103786					Automatic			Automatic	0.425135	279000594			Placa2306
116		WT05	HPRT1	Endogenous Control	26.8305	5.29252		26.8171	0.0103786			26.8171	0.0103786					Automatic			Automatic	0.425135	279000594			Placa2306
117		WT05	HPRT1	Endogenous Control	26.824	5.23811		26.8171	0.0103786			26.8171	0.0103786					Automatic			Automatic	0.425135	279000594			Placa2306
139		WT06	HPRT1	Endogenous Control	26.9354	4.76267		26.9372	0.015795			26.9372	0.015795					Automatic			Automatic	0.425135	279000594			Placa2306
140		WT06	HPRT1	Endogenous Control	26.9655	4.81172		26.9372	0.015795			26.9372	0.015795					Automatic			Automatic	0.425135	279000594			Placa2306
141		WT06	HPRT1	Endogenous Control	26.9109	4.89091		26.9372	0.015795			26.9372	0.015795					Automatic			Automatic	0.425135	279000594			Placa2306
163		WT07	HPRT1	Endogenous Control	26.7116	4.78022		26.7259	0.00942073			26.7259	0.00942073					Automatic			Automatic	0.425135	279000594			Placa2306
164		WT07	HPRT1	Endogenous Control	26.7437	4.7981		26.7259	0.00942073			26.7259	0.00942073					Automatic			Automatic	0.425135	279000594			Placa2306
165		WT07	HPRT1	Endogenous Control	26.7223	4.83248		26.7259	0.00942073			26.7259	0.00942073					Automatic			Automatic	0.425135	279000594			Placa2306
187		WT08	HPRT1	Endogenous Control	26.6023	4.71707		26.5671	0.0180284			26.5671	0.0180284					Automatic			Automatic	0.425135	279000594			Placa2306
188		WT08	HPRT1	Endogenous Control	26.5565	4.95979		26.5671	0.0180284			26.5671	0.0180284					Automatic			Automatic	0.425135	279000594			Placa2306
189		WT08	HPRT1	Endogenous Control	26.5426	4.78093		26.5671	0.0180284			26.5671	0.0180284					Automatic			Automatic	0.425135	279000594			Placa2306
211		WT09	HPRT1	Endogenous Control	26.5518	4.74932		26.5808	0.016068			26.5808	0.016068					Automatic			Automatic	0.425135	279000594			Placa2306
212		WT09	HPRT1	Endogenous Control	26.5834	4.82147		26.5808	0.016068			26.5808	0.016068					Automatic			Automatic	0.425135	279000594			Placa2306
213		WT09	HPRT1	Endogenous Control	26.6073	4.7631		26.5808	0.016068			26.5808	0.016068					Automatic			Automatic	0.425135	279000594			Placa2306
Summary Data for Study Placa2304-2305-2306-2307-2308.sdm
Endogenous Control	HPRT1
Calibrator	WT01
Multiplicity	Non-Multiplex
PlateID	Sample	Detector	Avg delta Ct	delta Ct SD	delta delta Ct	RQ	RQ Min	RQ Max	Threshold	Sample Status
	WT01	HPRT1							0.425135
	WT02	HPRT1							0.425135
	WT03	HPRT1							0.425135
	WT04	HPRT1							0.425135
	WT05	HPRT1							0.425135
	WT06	HPRT1							0.425135
	WT07	HPRT1							0.425135
	WT08	HPRT1							0.425135
	WT09	HPRT1							0.425135

## Sheet: Placa2309
SDS 2,2,2RQ Results	1				Sample	Age
Filename	Untitled 1				WT01	E15.5
Assay Type	RQ Study				WT02	E18.5
EmbeddedFile	Placa2309				WT03	P5
Run DateTime	Thu Jun 23 10:56:20 GMT 2016				WT04	P15
Operator					WT05	P1m
ThermalCycleParams					WT06	P2m
					WT07	P5m
					WT08	P10m
					WT09	P12m
Well	PlateID	Sample	Detector	Task	Ct	delta Rn	delta Ct	Ct Avg	Ct SD	Avg Delta Ct	delta Ct SD	Endo Ct Avg	Endo Ct SD	delta delta Ct	RQ	RQ Min	RQ Max	Baseline Type	Baseline Start	Baseline Stop	Threshold Type	Threshold	Instrument	Well Status	Rejected	Filename
229		WT01	SLC7A8	Target	30.6637	2.9639												Automatic			Automatic	0.517515	279000594			Placa2309
230		WT01	SLC7A8	Target	30.4912	3.1854												Automatic			Automatic	0.517515	279000594			Placa2309
231		WT01	SLC7A8	Target	30.4849	3.20785												Automatic			Automatic	0.517515	279000594			Placa2309
253		WT02	SLC7A8	Target	29.4082	3.45927												Automatic			Automatic	0.517515	279000594			Placa2309
254		WT02	SLC7A8	Target	29.7081	3.44716												Automatic			Automatic	0.517515	279000594			Placa2309
255		WT02	SLC7A8	Target	29.6907	3.49638												Automatic			Automatic	0.517515	279000594			Placa2309
277		WT03	SLC7A8	Target	28.3621	3.55669												Automatic			Automatic	0.517515	279000594			Placa2309
278		WT03	SLC7A8	Target	28.3322	3.56043												Automatic			Automatic	0.517515	279000594			Placa2309
279		WT03	SLC7A8	Target	28.3614	3.54377												Automatic			Automatic	0.517515	279000594			Placa2309
283		WT08	SLC7A8	Target	27.7406	3.65975												Automatic			Automatic	0.517515	279000594			Placa2309
284		WT08	SLC7A8	Target	27.5746	3.75501												Automatic			Automatic	0.517515	279000594			Placa2309
285		WT08	SLC7A8	Target	27.5615	3.72818												Automatic			Automatic	0.517515	279000594			Placa2309
301		WT04	SLC7A8	Target	28.6905	3.2931												Automatic			Automatic	0.517515	279000594			Placa2309
302		WT04	SLC7A8	Target	28.7676	3.29325												Automatic			Automatic	0.517515	279000594			Placa2309
303		WT04	SLC7A8	Target	28.7304	3.2904												Automatic			Automatic	0.517515	279000594			Placa2309
325		WT05	SLC7A8	Target	28.4679	3.37101												Automatic			Automatic	0.517515	279000594			Placa2309
326		WT05	SLC7A8	Target	28.4775	3.37773												Automatic			Automatic	0.517515	279000594			Placa2309
327		WT05	SLC7A8	Target	28.5973	3.26396												Automatic			Automatic	0.517515	279000594			Placa2309
349		WT06	SLC7A8	Target	28.4729	3.3102												Automatic			Automatic	0.517515	279000594			Placa2309
350		WT06	SLC7A8	Target	28.6323	3.10808												Automatic			Automatic	0.517515	279000594			Placa2309
351		WT06	SLC7A8	Target	28.4836	3.39384												Automatic			Automatic	0.517515	279000594			Placa2309
355		WT09	SLC7A8	Target	27.9436	3.48492												Automatic			Automatic	0.517515	279000594			Placa2309
356		WT09	SLC7A8	Target	27.9655	3.41083												Automatic			Automatic	0.517515	279000594			Placa2309
357		WT09	SLC7A8	Target	27.928	3.48888												Automatic			Automatic	0.517515	279000594			Placa2309
373		WT07	SLC7A8	Target	28.7583	3.40991												Automatic			Automatic	0.517515	279000594			Placa2309
374		WT07	SLC7A8	Target	28.8667	3.33432												Automatic			Automatic	0.517515	279000594			Placa2309
375		WT07	SLC7A8	Target	28.8974	3.33437												Automatic			Automatic	0.517515	279000594			Placa2309
Summary Data for Study Untitled 1
Endogenous Control	null
Calibrator	WT01
Multiplicity	Non-Multiplex
PlateID	Sample	Detector	Avg delta Ct	delta Ct SD	delta delta Ct	RQ	RQ Min	RQ Max	Threshold	Sample Status
	WT01								0
	WT02								0
	WT03								0
	WT04								0
	WT05								0
	WT06								0
	WT07								0
	WT08								0
	WT09								0
	WT01	SLC7A8							0.517515
	WT02	SLC7A8							0.517515
	WT03	SLC7A8							0.517515
	WT04	SLC7A8							0.517515
	WT05	SLC7A8							0.517515
	WT06	SLC7A8							0.517515
	WT07	SLC7A8							0.517515
	WT08	SLC7A8							0.517515
	WT09	SLC7A8							0.517515
